# Supplementary material for: Progress in the quantification of aerosol-cloud interactions estimated from the CALIPSO-CloudSat-Aqua/MODIS record
Source: Copernicus journal article supplement (doi:10.5194/egusphere-2025-4769), 2025-10-06
Supplement: Supplementary file [file egusphere-2025-4769-AC1-supplement.pdf]

## Reply to Reviewer # 1

We truly appreciate the reviewer's report and his/her comments that rightly challenge our analysis and result interpretation. Our responses will serve as a guideline for revising our manuscript. His/her specific comments are addressed below (highlighted in blue).

"Given these acknowledgments and the manuscript's title, one would expect substantive progress in addressing these limitations. However, only the issue of vertical collocation has been considered, following their previous work (Paneimal et al., 2020). Other important sources of uncertainty, such as variations in aerosol type and size distribution and the influence of aerosol hygroscopic growth, are equally relevant for CALIPSO-derived extinction profiles. These factors are either neglected, deemed insignificant without sufficient justification, or, surprisingly, suggested to be not important for future ACI studies in the discussion section."

Thanks for pointing out that the introduction did not meet the reader's expectations about the aspects that the manuscript actually addresses and those that remain unanswered due to the limitations of our observational dataset. In our search for conciseness, we did not provide enough necessary details the rationale behind a given analysis or conclusion. In the revised manuscript, we will describe more clearly what is specifically addressed by our study and will be more precise about our assumptions and uncertainties of the analysis. In addition, we include a lidar ratio analysis to address the role of aerosol type and particle size in the analysis. The general reviewer's concerns are more specifically addressed in the following. Regarding the title, we will be revising the title of the manuscript to: "Advancing the quantification of aerosol-cloud interactions with the use of the CALIPSO-CloudSat-Aqua/MODIS record".

"I have several major concerns, primarily regarding the aerosol and cloud sampling criteria employed in this analysis. These include the inappropriate inclusion of precipitating clouds in the computation of Nd susceptibility, the use of aerosol properties from highly humid regions adjacent to clouds, the restriction to broken-cloud 25 km X 25 km scenes for estimating LWP susceptibility, and the fine spatial aggregation applied in the analysis. Each of these issues could significantly affect the derived sensitivities and should be carefully revisited. Addressing these points is essential for the manuscript to substantiate its claim of advancing the assessment of aerosol-cloud interactions."

We are grateful to the reviewer for bringing these points up. All these concerns are valid and are responded in detail below.

### Major Comments:

1. "The authors limit the 25 by 25 km cloud fraction (CF) to 90% to exclude cases where aerosols are fully embedded within cloudy regions, on the premise that such situations are affected by aerosol swelling due to hygroscopic growth at high relative humidity (RH). However, this filtering does not adequately ensure that hygroscopic growth is properly accounted for. Aerosol retrievals in direct contact with cloudy pixels (likely cloud-contaminated pixels) can still be significantly influenced by hygroscopic growth effects, irrespective of CF. As demonstrated in Christensen et al. (2017), this can lead to artificially enhanced correlations between Nd and AOD or AI. Since the cloud-level aerosol extinction coefficients are considered in the present manuscript, where the RH effect is likely significant, the derived susceptibilities may be biased."

The reviewer's points are highly pertinent to our study. There are 2 aspects of aerosol hygroscopicity that need further discussion.

- a) Variable effect of hygroscopicity attributed to the proximity of the aerosol pixel to clouds: This is our primary concern because, as the reviewer is aware, studies have shown that the dependence of AOD on cloud fraction (CF) is primarily the effects of multiple artifacts in the aerosol retrievals, rather than a physical signature of cloud adjustment (e.g. Varnai et al.). So, our data filtering was primarily intended to minimize the sensitivity of aerosol retrievals to cloud coverage. As explained in the manuscript, the effect of clouds on aerosol is not only the influence of hygroscopicity but also the substantial effect of aerosol-cloud misclassification, and 3-D radiative transfer effects. Key advantages of CALIOP include: insensitivity to 3-D radiative effects, and an improved aerosol and cloud identification relative to passive imagers like MODIS. Given the advantages of CALIOP, we conclude that the analysis of Christensen et al. (2017) is only representative of MODIS AOD and similar products derived from passive sensors. A way to visualize the effect of clouds in AOD retrievals is by analyzing the relationship between CF and AOD. Fig R1a illustrates this relationship. First, our CALIOP-based AOD shows a modest increase with CF, which only becomes severe for  $CF > 0.95$ , that is, when the CALIOP pixels are surrounded by clouds. Because we remove samples with MODIS  $CF > 0.9$ , we can effectively remove CALIOP grids more affected by aerosol swelling due to clouds. In a similar manner, filtering our cloud retrievals ( $N_d$ , FigR1a, red line) minimizes the  $N_d$  dependence on CF (Fig. R1b). All in all, the final filtering of both  $N_d$  and CALIPSO-SODA AOD (Fig R1b, red circles) yield a much weaker slope relative to data without filtering. This shows that our method removes multiple effects and artifacts that could conspire to enhance ACI. Lastly, we would like to remind the reviewer that this CALIOP aerosol retrievals are only used if the corresponding 5km along-track CALIOP grid is cloud free.

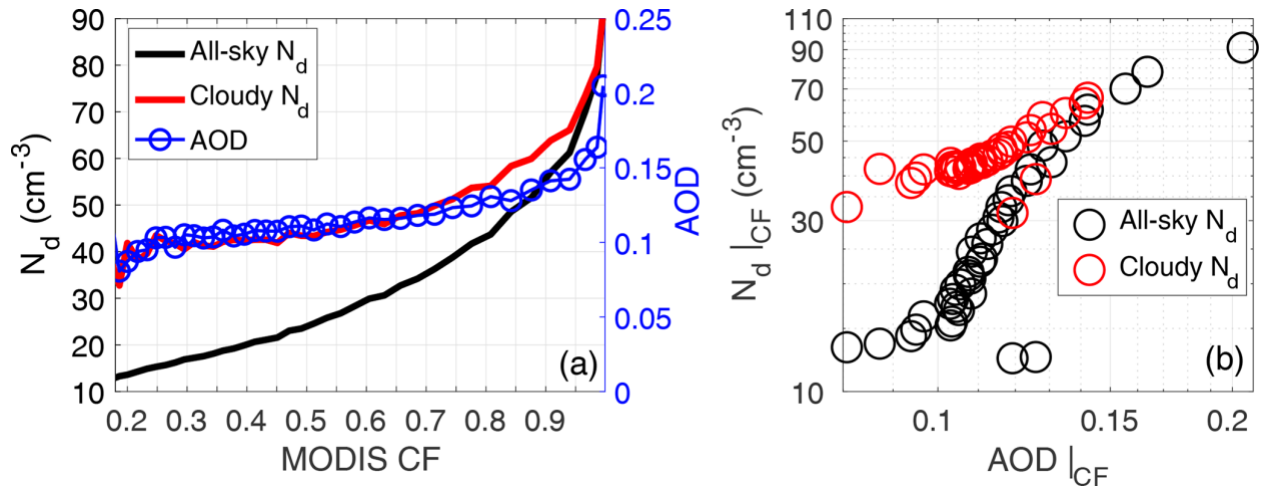

Figure R 1: Figure adapted from Painemal et al. 2020 (Fig. 2a). a) relationship between segment CF from MODIS and: all-sky  $N_d$  (without filtering), cloudy  $N_d$  (cloud fraction  $> 90\%$  within a 5 pixel x 5 pixel box), and AOD averaged for 5-km cloud-free CALIOP grids. b) relationship between AOD and  $N_d$  without filtering (black) and after applying CF filtering (red).

- b) Hygroscopicity as a function of the ambient relative humidity (RH). The figure below depicts the mean relative humidity at around 800 m (925 hPa) from MERRA-2. Notably, RH exceeds 80 % (0.8) for most of the oceanic regions. Smaller RH values are observed over the eastern Pacific and Atlantic, because the inversion height in those regions is below 925 hPa (in addition to the potential misrepresentation of the boundary layer height in the model). The figure also indicates that the range of RH variability is somewhat constrained to a narrow range. In other words, in the context of the reviewer's comment, regional changes in AOD are primarily driven by the aerosol type and their specific hygroscopicity rather than variability in RH. Even if RH modulates the absolute value of AOD and extinction coefficient, this does not necessarily translate to biases in ACI. Unfortunately, we do not count on the dataset to address this science question (see our replies below).

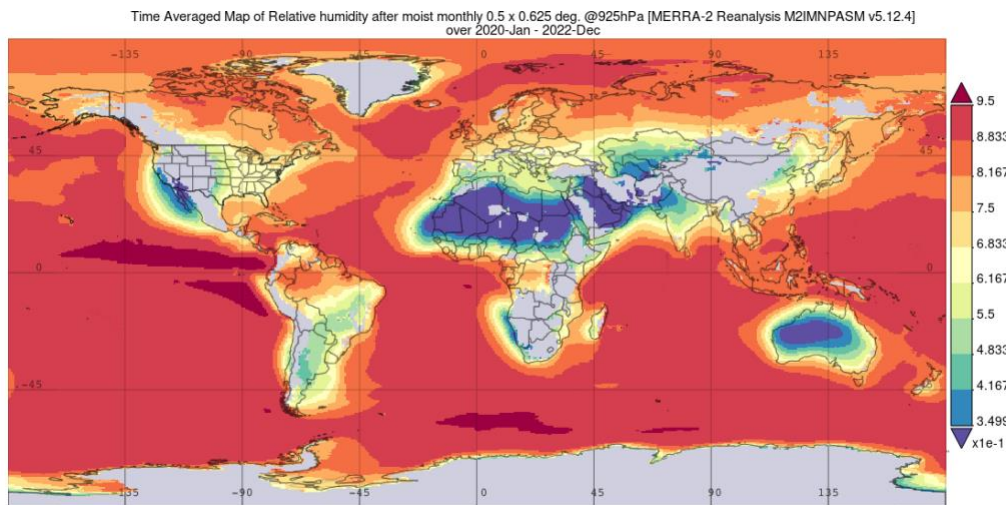

Figure R2: Annual mean relative humidity at 925 hPa (~800 m). Values range between 0.3 and 0.95 (35% and 95%).

“I recommend redoing the calculations after omitting aerosol retrievals in pixels directly adjacent to cloudy columns irrespective of total CF. This will also address another issue in computing  $d\ln LWP/d\ln Nd$  (see next paragraph). This approach has been adopted in several recent ACI studies using satellite-derived AI to estimate Nd susceptibility (e.g., Jia et al., 2022).

We show in our reply above that: a) our method does remove effects of aerosol swelling near the vicinity of clouds, and b) Multiple artifacts reported in the literature regarding multiple cloud effects on AOD derived from passive sensors are substantially ameliorated when using CALIOP. Regarding the latter, Yang et al. (2014) conclude based on CALIOP data: “This result suggests that systematic changes in the near-cloud transition zone are real but somewhat weaker than previously reported and that understanding the statistics of near-cloud aerosol properties requires a consideration of changes in cloud fraction.” The conclusions in Yang et al. are consistent with our assertion about the quality of the CALIPSO retrievals and our data filtering.

Reference:

Yang, W., A. Marshak, T. Várnai, and R. Wood (2015), CALIPSO observations of near-cloud aerosol properties as a function of cloud fraction, *Geophys. Res. Lett.*, 41, 9150–9157, doi:[10.1002/2014GL061896](https://doi.org/10.1002/2014GL061896).

Alternatively, aerosol retrievals can be filtered using an RH threshold (e.g., only including retrievals where  $RH < 70\text{--}80\%$ ), within which hygroscopic growth is limited for both continental and marine aerosol types. RH values can be obtained from the operational CALIPSO product (which includes interpolated meteorological parameters) or directly from reanalysis datasets such as ERA5 or MERRA-2. This is a fundamental consideration in satellite-based ACI studies and should not be overlooked, particularly in a study aiming to advance current estimates of Nd susceptibility.”

As shown in Fig. R2, the high RH in the boundary layer makes the reviewer suggestion challenging to implement. A second question to address is to account for aerosol swelling, that is, converting, aerosol extinctions from ambient RH to dry values ( $RH < 50\%$ ). This is generally done by assuming a parameterization that is a function of RH (e.g. Gasso et al., 2000; Zieger et al., 2013). Zieger et al. (2013) show that this scattering enhancement factor can vary significantly depending on the air mass and aerosol composition. It might be possible to characterize the aerosol types using CALIPSO aerosol classification, but we argue that this typing does not provide sufficient information nor a consistent optical characterization for our study (e.g. Li et al., 2022). Because the scattering enhancement factor parameterization is sensitive to the aerosol mass and we do not count on a reliable way to characterize the aerosol hygroscopicity, we decided not to apply any correction that could introduce more uncertainties.

#### Reference:

Zieger, P., Fierz-Schmidhauser, R., Weingartner, E., and Baltensperger, U.: Effects of relative humidity on aerosol light scattering: results from different European sites, *Atmos. Chem. Phys.*, 13, 10609–10631, <https://doi.org/10.5194/acp-13-10609-2013>, 2013.

S. Gassó, D. A. Hegg, D. S. Covert, D. Collins, K. J. Noone, E. Öström, B. Schmid, P. B. Russell, J. M. Livingston, P. A. Durkee & H. Jonsson (2000) Influence of humidity on the aerosol scattering coefficient and its effect on the upwelling radiance during ACE-2, *Tellus B: Chemical and Physical Meteorology*, 52:2, 546-567, DOI: 10.3402/tellusb.v52i2.16657

Li, Z., Painemal, D., Schuster, G., Clayton, M., Ferrare, R., Vaughan, M., Josset, D., Kar, J., and Trepte, C.: Assessment of tropospheric CALIPSO Version 4.2 aerosol types over the ocean using independent CALIPSO–SODA lidar ratios, *Atmos. Meas. Tech.*, 15, 2745–2766, <https://doi.org/10.5194/amt-15-2745-2022>, 2022.

“Furthermore, the decision to omit cloud retrievals with  $CF > 90\%$  (within  $25 \times 25$  km scenes) when computing  $d\ln LWP/d\ln Nd$  is not justified. Both LWP and Nd are derived from MODIS cloud retrievals, which tend to be more reliable in overcast cloud fields due to their higher spatial homogeneity. Such conditions better satisfy the plane-parallel cloud approximation, and consequently, three-dimensional radiative effects are minimized (Zhang and Platnick, 2011). I recommend removing the CF filtering from Nd-LWP susceptibility calculations.”

The reviewer is correct in that removing fully overcast scenes in the context of quantifying  $d\ln LWP/d\ln N_d$  is unjustified. The single reason why we adopted this filtering was for consistency in the methodology because ACI was calculated using the same manner. The new figure is included below. These new maps are nearly identical to their counterparts in the original manuscript.

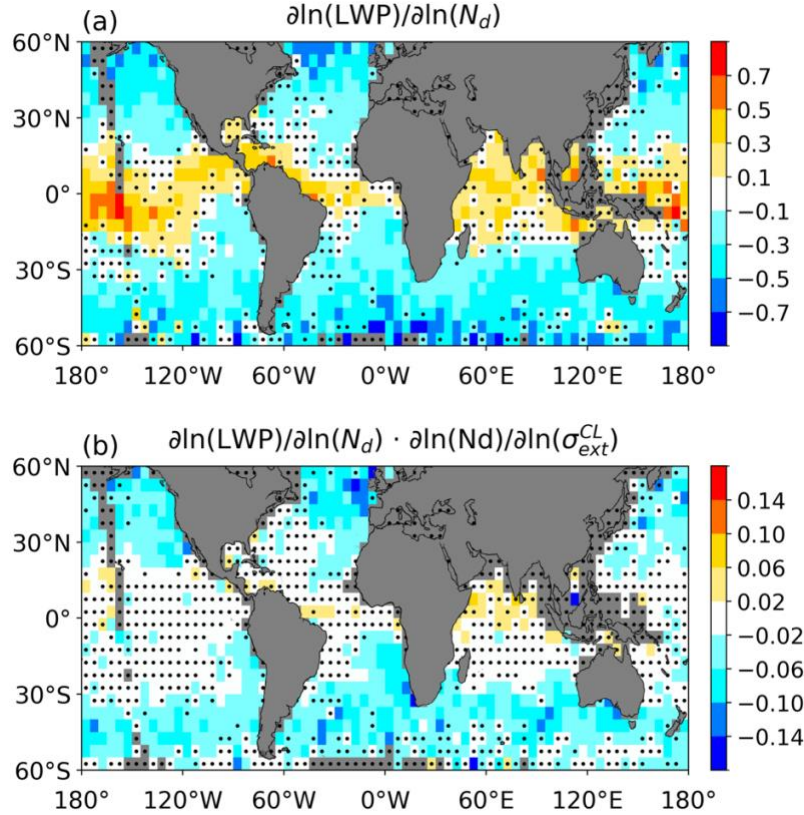

Figure R3: Gridded maps of (a) susceptibility of LWP to  $N_d$  or  $S_{LWP}^{Nd} = \frac{\partial \ln(LWP)}{\partial \ln(N_d)}$ ; and (b) overall LWP susceptibility to aerosols estimated as  $S_{LWP} = S_{LWP}^{Nd} \cdot ACI$ . Black dots in (a) indicate grids that are statistically indistinguishable from zero, according to a Student's t test at 95% confidence level, whereas dots in (b) represent boxes when at least one metric (ACI or  $S_{LWP}^{Nd}$ ) is statistically indistinguishable from zero. The LWP susceptibility computation includes 25-km cloud fraction  $> 0.9$  (90%).

2. Lines 236–237: The authors state, “Indeed, global ACI for non-precipitating ( $Z_{max} < -15$  dBZ) and precipitating ( $Z_{max} > -15$  dBZ) segments is 0.13 and 0.08, respectively.” It is unclear how this information can be inferred from Fig. 5. I assume that the authors averaged the ACI indices over grid points with the minimum or maximum probability of precipitation (POP). If this interpretation is correct, further clarification is necessary on how this separation was implemented and statistically represented in the figure. Based on this assumption, I have an additional related comment below.



Indeed, the statement is unclear. POP=0 and POP>0 define the non-precipitating and precipitating observations. This is now clarified in the revised manuscript. The general question about precipitating vs non-precipitating samples is addressed in the following.

3. Another fundamental issue not addressed in this study is the inclusion of precipitating clouds in the calculation of the ACI index or Nd susceptibility, which leads to two key issues. First, precipitating clouds introduce significant uncertainty in Nd retrievals, as the assumption of adiabaticity no longer holds. Second, collision-coalescence reduces Nd independent of aerosol loading, thereby distorting the aerosol–cloud relationship. The inclusion of precipitating scenes can lead to a non-causal positive bias in Nd susceptibility of approximately 21% (Jia et al., 2022). Since the authors already utilize CloudSat observations to identify precipitating clouds, it would be straightforward to exclude precipitating clouds from the analysis and recompute Nd susceptibility accordingly.

Correct, it is expected that precipitation will affect the magnitude of the slopes (see our previous response). During the early stage of the analysis, our goal was to provide ACI maps that could be easily compared against other datasets or model outputs. This is the primary reason why we did not separate precipitating from non-precipitating samples. However, we see the value in implementing the reviewer’s suggestion and we are now including computations estimated for precipitating and non-precipitating data. Figure R4 depicts statistics for precipitating samples, defined as those with probability of precipitation (POP) higher than 0.3, and non-precipitating clouds for samples with POP <0.05.

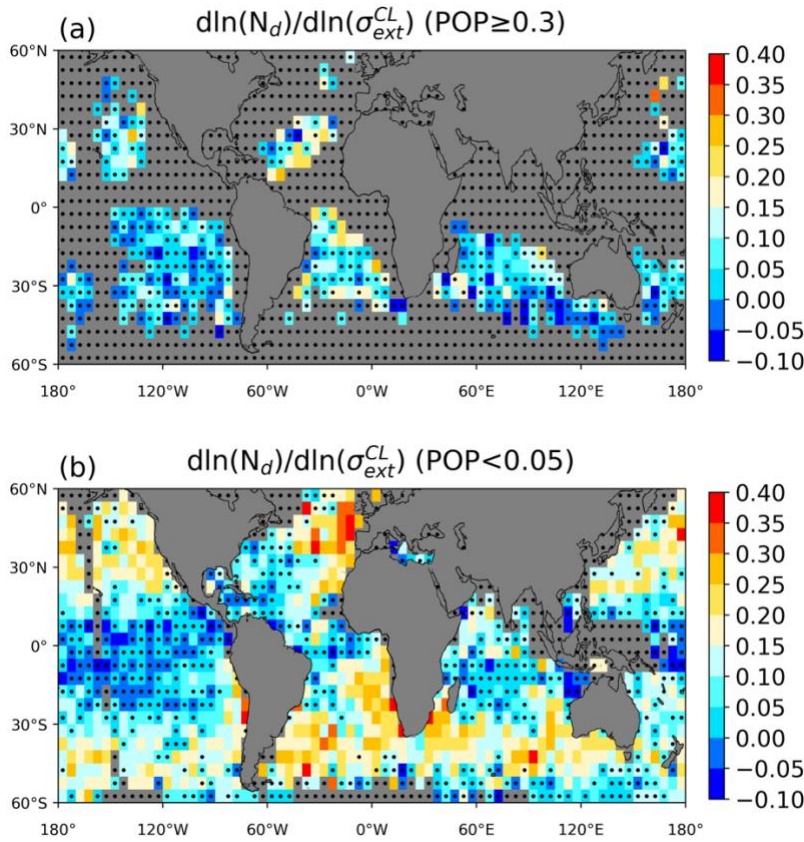

Figure R4: Gridded map of ACI index ( $d \ln(N_d) / d \ln(\sigma_{ext}^{CL})$ ). Black dots indicate grids that are statistically indistinguishable from zero, according to a Student's t test at 95% confidence level. a) ACI index for sampling with significant precipitation frequency (POP>0.3), and b) non-precipitating clouds (POP<0.05).

4. Since the authors use LWP and Nd from MODIS following a similar approach to previous studies (e.g., Gryspeerdt et al., 2019), the primary differences between their results and those in the literature appear to stem from the finer aggregation scale (25 km × 25 km instead of 100 km × 100 km) and the exclusion of pixels with CF > 90%. One concern here is the use of such a fine grid size. A 25 km × 25 km domain may not be sufficiently large to capture the structural or morphological variability within cloud systems over oceans. While cloud-top Nd tends to be relatively homogeneous in non-precipitating clouds, as it is primarily governed by the initially activated CCN population, the situation is different for LWP. Within a cloud, LWP typically peaks in the core regions and decreases toward the periphery, leading to substantial intra-cloud heterogeneity. This variability becomes even more pronounced in precipitating clouds. So, for similar Nd, we can have two different LWP, because of the cloud morphology, not directly because of aerosols. It is unclear how these in-cloud variations are accounted for in the current analysis, and clarification on this point is necessary to assess the robustness of the derived susceptibilities.

The author raises an interesting point. However, it is unclear to us how the effect of heterogeneity might affect the computation of susceptibility. For example, while a 25 km scale might seem small, it is within the range of spatial variability of closed-cell structures (Wood and Hartmann et al., 2006, <https://doi.org/10.1175/JCLI3702.1>), which are dominant in subtropical and postfrontal regions. 25km is also larger than the size of shallow cumulus clouds. So, we find ourselves in the difficult situation of choosing a scale that represents the range of variability of marine low clouds, while, at the same time, a grid sufficiently small to assume that cloud-free aerosol retrievals are representative of the nearly-adjacent cloudy areas. It is also relevant to recall that regressions are computed over 5°x5° grids. Considering all these points, we do not have sufficient arguments to change the spatial collocation of Figure 1.

5. Line 319: The authors state that “future analyses should be framed in terms of the ambient aerosol extinction coefficient.” It is unclear how this recommendation is justified, given that aerosol hygroscopic growth is known to bias Nd susceptibility estimates. Numerous previous studies have recognized and explicitly accounted for this effect (e.g., Christensen et al., 2017; Hasekamp et al., 2019; Jia et al., 2022; Quaas et al., 2020). The authors should clarify the rationale behind this suggestion.

Regarding the comment about the justification for using ambient aerosol extinction coefficient: While methods for accounting for hygroscopicity have been presented in the literature, we are convinced that their applications to satellite data have not validated with the necessary details, nor the uncertainties assessed to the point that we can fully rely on these methods. That is, we argue that unless retrieval refinements are rigorously compared against independent datasets, it is recommended to directly use the satellite retrievals.

Minor comments:

6. Line 26: “Observational estimates ...” instead of “Estimates”?

Corrected, thanks.

7. Lines 48-49: Do you mean the “updraft limited regime” (Reutter et al., 2009)?

Yes, we are referring to the updraft limited regime. We appreciate the reviewer for suggesting the Reutter et al. article. The article is now cited in the same section.

8. Line 64: Citing the authors: “Regrettably, the application of spaceborne lidar observations to the ACI computation is still surprisingly lacking.” This is not entirely true. Alexandri et al. (2024) combined CALIPSO-derived CCN concentrations with Nd from geostationary observations in a sophisticated cloud-by-cloud framework using an advanced cloud tracking and matching algorithm.

We agree with the reviewer in that the sentence was inaccurate or, at least, too strong. In the revised version, we rephrased the sentence to read: “Regrettably, studies that make use of spaceborne lidar observations for ACI studies are surprisingly scarce, and global scale analyses are lacking”. Alexandri et al. (2024) will be discussed in more detailed in the discussion section.

9. Line 106: Which wavelength was used for the effective radius and why? Did the authors apply the condensation rate temperature correction based on Gryspeerdt et al. (2019) when calculating Nd?

We used CERES-MODIS droplet effective radius derived using the 3.7  $\mu\text{m}$  channel. This wavelength is less sensitive to 3D radiative effects, and spatial inhomogeneities (Painemal et al., 2013 and references therein). Unlike Gryspeerdt et al (2019), we directly used an analytical formulation for estimating the adiabatic lapse rate. In other words, no corrections are needed because the derivation is directly estimated from adiabatic considerations (see Albrecht et al. 1990). It suffices to say that the adiabatic computation follows the thermodynamic equation described in Albrecht et al.

Reference:

Painemal, D., Minnis, P., and Sun-Mack, S.: The impact of horizontal heterogeneities, cloud fraction, and liquid water path on warm cloud effective radii from CERES-like Aqua MODIS retrievals, *Atmos. Chem. Phys.*, 13, 9997–10003, <https://doi.org/10.5194/acp-13-9997-2013>, 2013.

10. Which correlation coefficient is shown in Figures 2 and 3? Please mention it in the caption. I recommend the pearson’s correlation coefficient. If the authors prefer spearman, please provide the figures with pearson’s correlation coefficient in the supplementary.

Good suggestion. We will be adding the Pearson correlation maps in the supplement section. The key reason for selecting the Spearman’s correlation coefficient is that this correlation is minimally sensitive to outliers and better capture monotonic changes in a 2-variable relationship.

11. Figure 4: How do the authors interpret negative  $d\ln Nd/d\ln EXT$

Our explanation is rather simple and guided by the statistical significance of the slopes. Because the negative slopes are statistically indistinguishable from a zero slope, we treat these negative values as being of a negligible value and no inferences are made about the sign of the slope.



12. Line 262:  $d\ln LWP/d\ln N_d$  is also affected by sampling bias due to missing cloud properties in MODIS as a result of retrieval failure, particularly the positive  $d\ln LWP/d\ln N_d$  response (Choudhury and Goren, 2025).

Yes, a sampling bias is certainly a possibility. However, we argue that the quantification of a sampling bias is not possible because assumptions need to be made about the cloud retrievals for those missing pixels. The major issue is validating those assumptions, which, realistically, cannot be done with satellite data only. Satellite simulators and synthetic cloud fields generated by a (cloud) model might help answer this question, but we are not aware of studies that have conducted this type of research. In the revised manuscript, we are going to briefly discuss the potential sampling bias, primarily over regions with the presence of shallow cumulus clouds.

13. I suggest the authors provide a supplementary figure showing  $d\ln N_d/d\ln(\text{EXT}_{\text{surface}})$  and  $d\ln N_d/d\ln(\text{AOD})$ ?

The new figures will be provided in the supplement and will be briefly discussed in the manuscript.

14. A general observation from Figures 4 and 9 is low or negative ACI index over pristine oceans. Can the authors comment on why this could happen in both CALIPSO and MODIS retrievals?

A physical mechanism that could explain the low ACI index over pristine oceans is turbulence in the boundary layer. Because turbulence directly affects the supersaturation at the cloud base, changes in turbulence could explain varying aerosol activation into droplets even for the same aerosol loading (concentration). This explanation is plausible as regions with low ACI index coincide with areas characterized by low cloud coverage and thus, with a reduced cloud top radiative cooling, leading to weaker boundary layer turbulence.

Another factor is associated with the aerosol type over the open ocean. We used the retrieved lidar ratio from CALIPSO-SODA to determine the impact of aerosol typing. Informed by studies based on Raman lidar and high spectral resolution lidar (HSRL, e.g. Burton et al., 2011), clean marine aerosols can be identified with relatively high confidence for samples possessing lidar ratios (LR)  $< 30$  sr. Similarly, pollution and biomass burning aerosol are characterized by  $LR > 50$  sr. Values between 30 sr and 50 sr corresponds to mixture of multiple aerosols, including dust. The relationship for these 3 aerosol types reveals that the ACI metric increases with LR, with values for polluted aerosol exceeding those for clean marine aerosols. If these clean marine aerosols are dominated by the presence of sea salt, then just a few large particles could be contributing to enhanced aerosol extinction coefficient, and thus weakening the relationship between  $N_d$  and aerosol extinction coefficient.

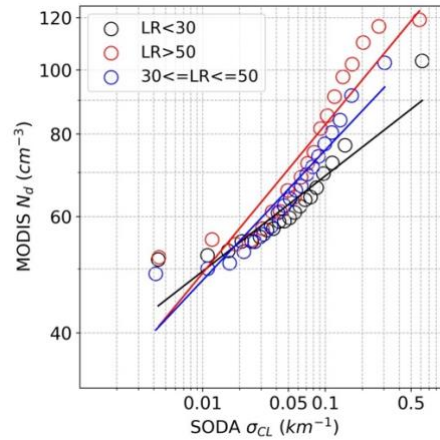

Figure R5: Relationship between  $N_d$  and aerosol extinction coefficient for 3 different ranges of aerosol lidar ratios (LR). Clean marine aerosols are identified by  $LR < 30$  sr

Reference:

Burton, S. P., Ferrare, R. A., Hostetler, C. A., Hair, J. W., Rogers, R. R., Obland, M. D., Butler, C. F., Cook, A. L., Harper, D. B., and Froyd, K. D.: Aerosol classification using airborne High Spectral Resolution Lidar measurements – methodology and examples, *Atmos. Meas. Tech.*, 5, 73–98, <https://doi.org/10.5194/amt-5-73-2012>, 2012.
